# Supplementary material
Source: MDPI journal article supplement (https://www.mdpi.com/2073-4344/14/1/71)
Supplement: s1 [file s1]

# Fe<sub>3</sub>O<sub>4</sub>-CdO nanocomposite for organic dye photocatalytic degradation: synthesis and characterization

Ahlam Albeladi<sup>1</sup>, Zaheer Khan<sup>1</sup>, Shaeel Ahmed Al-Thabaiti<sup>1</sup>, Rajan Patel<sup>2</sup>, Maqsood Ahmad Malik<sup>3\*</sup> and Shilpa Mehta<sup>4</sup>

<sup>1</sup>Chemistry Department, Faculty of Science, King Abdulaziz University, P.O. Box 80203, Jeddah 21589, Saudi Arabia.

<sup>2</sup>Biophysical Chemistry Laboratory, Centre for Interdisciplinary Research in Basic Sciences, Jamia Millia Islamia, New Delhi 110025, India

<sup>3</sup>Department of Chemistry, Faculty of Sciences, Jamia Millia Islamia, New Delhi-110025, India

<sup>4</sup>Department of Chemistry, Ramjas College, University of Delhi, Delhi-110007, India

\* Correspondence: Corresponding authors: maqsoodchem@gmail.com

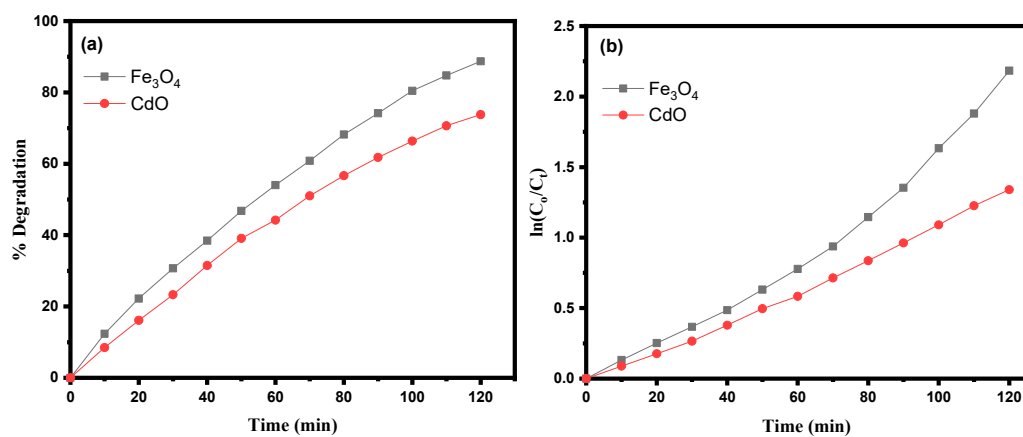

Figure S1. (a) Photocatalytic degradation efficiency and (b) plot of  $\ln(C_0/C_t)$  versus time of pure Fe<sub>3</sub>O<sub>4</sub> and CdO nanoparticles.

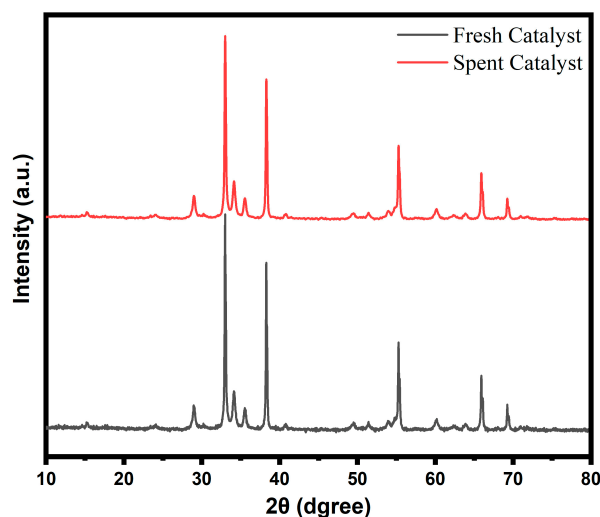

Figure S2. XRD of fresh and spent CdO-Fe<sub>3</sub>O<sub>4</sub> catalyst.

Table S1. Rate constants at different catalyst dosages and dye concentrations.

| Parameters                    |    | $K_I$   |
|-------------------------------|----|---------|
| Catalyst<br>Lodging<br>(mg)   | 10 | 0.00736 |
|                               | 20 | 0.01048 |
|                               | 30 | 0.01409 |
|                               | 40 | 0.02345 |
| Dye<br>Concentration<br>(ppm) | 30 | 0.02345 |
|                               | 40 | 0.01166 |
|                               | 50 | 0.00853 |
|                               | 60 | 0.00575 |
